# Supplementary material for: Localization and Maintenance of Engrafted Mesenchymal Stem Cells Administered via Renal Artery in Kidneys with Ischemia-Reperfusion Injury
Source: MDPI journal article supplement (doi:10.3390/ijms22084178), 2021-04-17

## **Supplementary files**

### **Localization and maintenance of engrafted mesenchymal stem cells administered via renal artery in kidneys with ischemia-reperfusion injury**

Yumi Yamada<sup>1</sup>, Ayumu Nakashima<sup>1,2</sup>, Shigehiro Doi<sup>1</sup>, Naoki Ishiuchi<sup>1</sup>, Ryo Kanai<sup>1</sup>, Kisho Miyasako<sup>1</sup> and Takao Masaki<sup>1</sup>

<sup>1</sup>Department of Nephrology, Hiroshima University Hospital, 1-2-3 Kasumi, Minami-ku, Hiroshima, Hiroshima 734-8551, Japan

<sup>2</sup>Department of Stem Cell Biology and Medicine, Graduate School of Biomedical & Health Sciences, Hiroshima University, 1-2-3 Kasumi, Minami-ku, Hiroshima, Hiroshima 734-8553, Japan

This file includes supplementary table 1 and western blotting uncropped gel images.

**Supplementary table file.**

**Supplemental table 1.** Time course of engraftment of hMSCs. The number of CM-DiI-stained hMSCs delivered arterially in 10 random fields ( $\times 100$ ) in kidney, lung, and spleen at days 1, 3, 7, and 21 post-IRI (A), and without undergoing IRI (B).

**A**

| <b>hMSC counts (cells), IRI(+)</b> |                  |                  |                 |                 |
|------------------------------------|------------------|------------------|-----------------|-----------------|
|                                    | day 1 (n=5)      | day 3 (n=5)      | day 7 (n=5)     | day 21 (n=5)    |
| Whole kidney                       | 143.2 $\pm$ 58.1 | 114.6 $\pm$ 29.6 | 62.7 $\pm$ 13.6 | 59.4 $\pm$ 22.9 |
| Glomeruli                          | 135.6 $\pm$ 55.8 | 106.2 $\pm$ 31.5 | 46.8 $\pm$ 8.3  | 34.8 $\pm$ 12.2 |
| Tubule+Interstitial                | 7.6 $\pm$ 3.0    | 8.4 $\pm$ 5.5    | 15.8 $\pm$ 11.5 | 24.6 $\pm$ 17.5 |
| Lung                               | 19 $\pm$ 8.7     | 22 $\pm$ 8.2     | 9.2 $\pm$ 4.5   | 6.6 $\pm$ 1.4   |
| Spleen                             | 8.2 $\pm$ 1.7    | 19.4 $\pm$ 10.4  | 16.2 $\pm$ 7.9  | 6.4 $\pm$ 4.5   |

**B**

| <b>hMSC counts (cells), IRI(-)</b> |                 |                 |                 |               |
|------------------------------------|-----------------|-----------------|-----------------|---------------|
|                                    | day 1 (n=5)     | day 3 (n=5)     | day 7 (n=5)     | day 21 (n=5)  |
| Whole kidney                       | 73.5 $\pm$ 22.7 | 42.8 $\pm$ 28.5 | 28.5 $\pm$ 14.7 | 7.0 $\pm$ 2.1 |
| Glomeruli                          | 62.0 $\pm$ 24.8 | 50.0 $\pm$ 18.5 | 20.3 $\pm$ 14.0 | 0.8 $\pm$ 1.6 |
| Tubule+Interstitial                | 11.5 $\pm$ 5.7  | 5.25 $\pm$ 3.6  | 8.3 $\pm$ 5.1   | 6.2 $\pm$ 2.9 |
| Lung                               | 21.0 $\pm$ 14.0 | 11 $\pm$ 0.8    | 12.5 $\pm$ 7.9  | 7.6 $\pm$ 4.0 |
| Spleen                             | 10.5 $\pm$ 5.9  | 19.7 $\pm$ 7.3  | 7.5 $\pm$ 7.6   | 7.6 $\pm$ 0.8 |

Data are presented as the mean  $\pm$  SD.

hMSCs, human mesenchymal stem cells; IRI, ischemia-reperfusion injury

Western blotting uncropped gel images

Figure 2

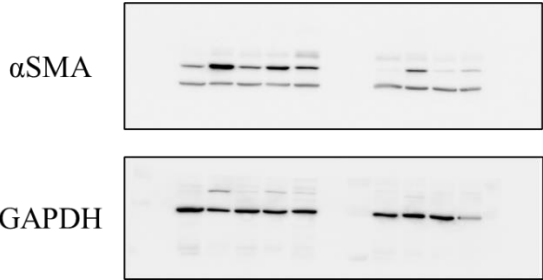

Supplement: s1 [file s1]
